# Supplementary figures and images for: The Heterocyst-Specific NsiR1 Small RNA Is an Early Marker of Cell Differentiation in Cyanobacterial Filaments
Source: PubMed Central journal article supplement — mBio. 2014 May 13;5(3):e01079-14. doi: 10.1128/mBio.01079-14 (PMC4030482; doi:10.1128/mbio.01079-14), 2014-05-13

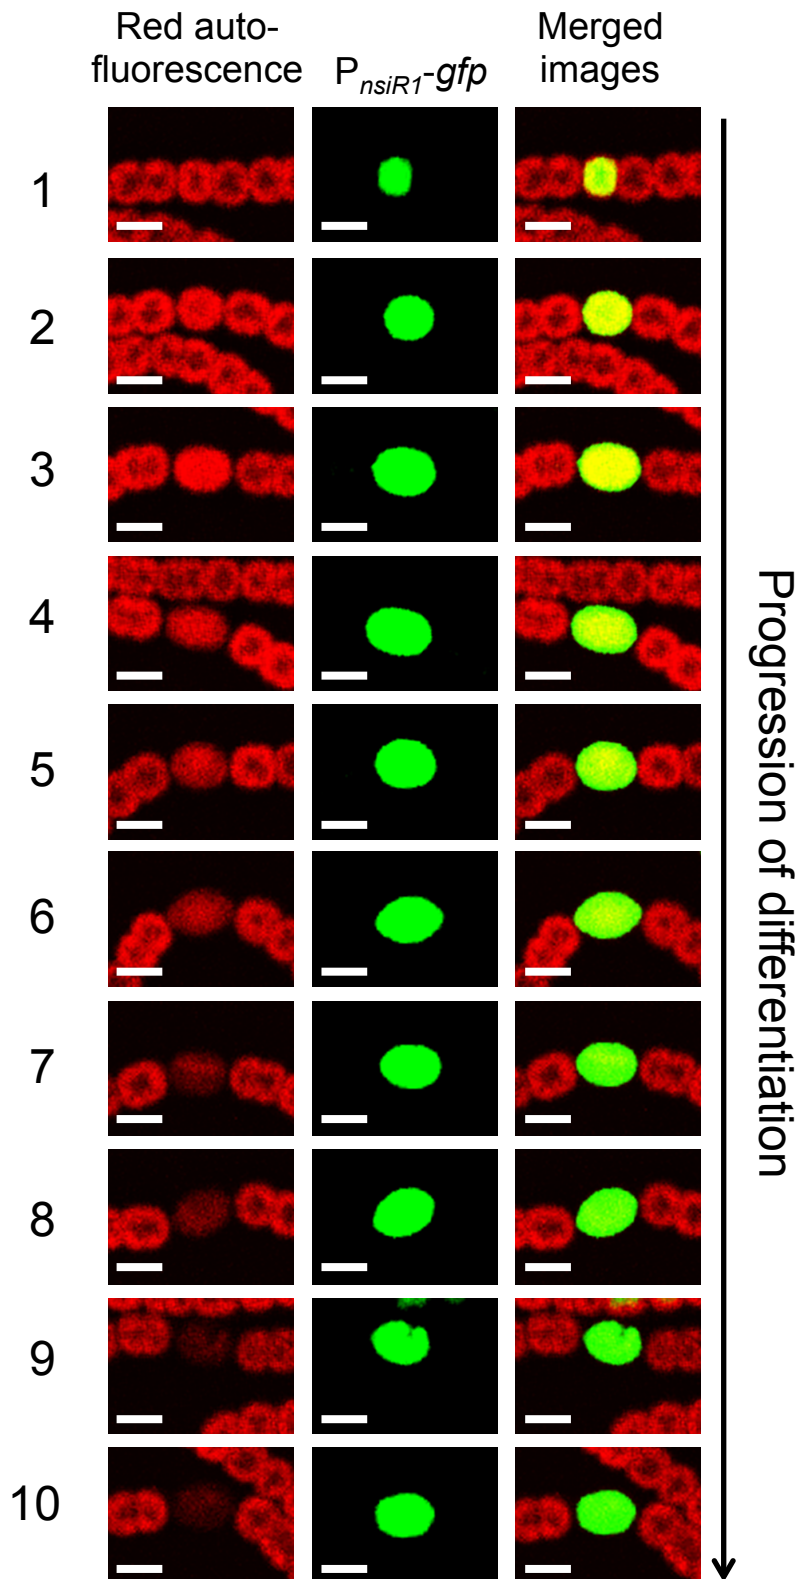

Supplement: mbo003141832sf01.pdf [file mbo003141832sf01.pdf]

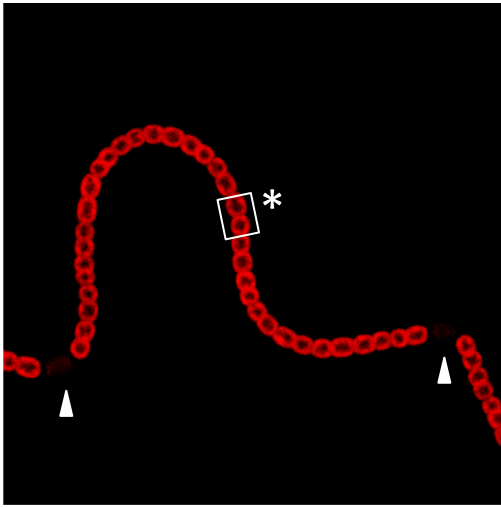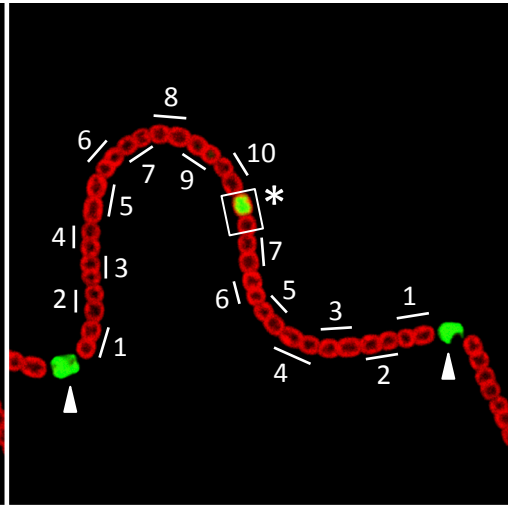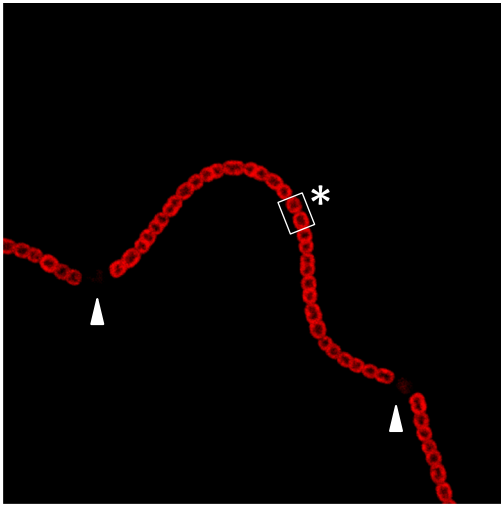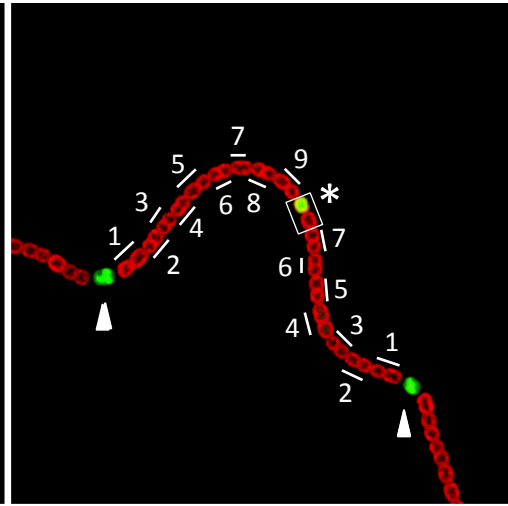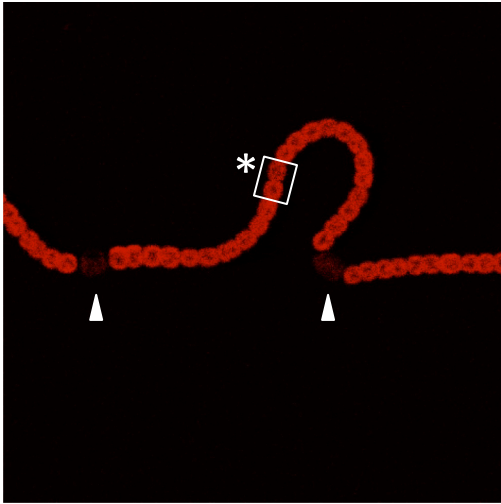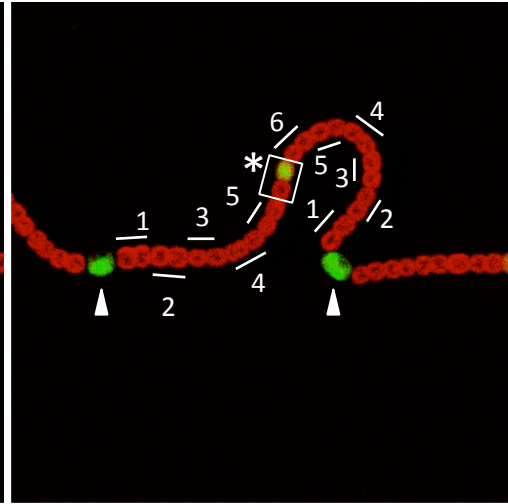

Supplement: mbo003141832sf02.pdf [file mbo003141832sf02.pdf]
